# Supplementary material for: The preparation and characterisation of cyclam/anthraquinone macrocyle/intercalator complexes and their interactions with DNA
Source: Royal Society of Chemistry journal article supplement (doi:10.1039/b302123h), 2003-01-01
Supplement: b302123h.doc [file b302123h.doc]

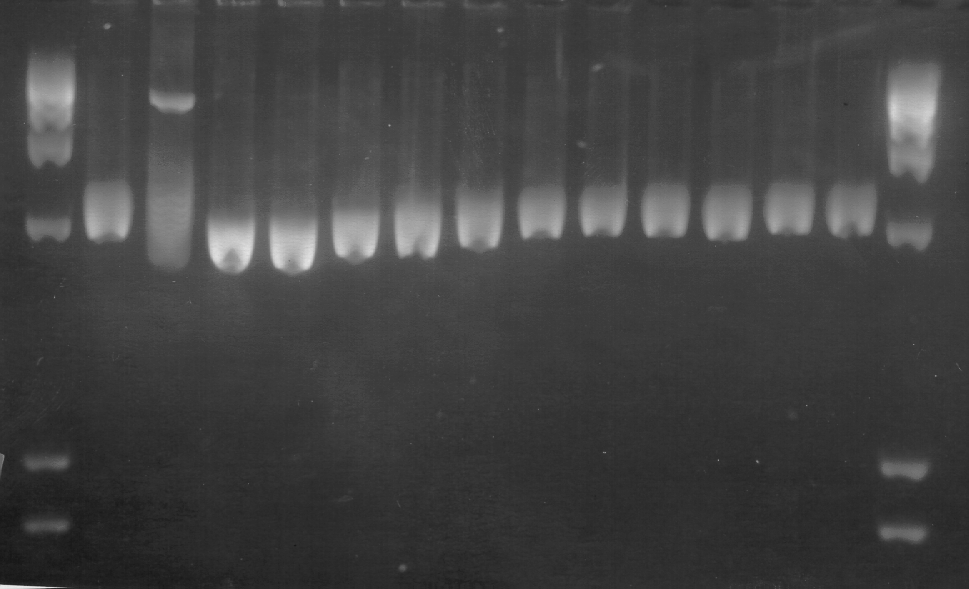


Figure S1: Gel electrophoresis pattern of PBR322 DNA treated with 1C3mac and *Bam*H1 restriction enzyme. The lanes (from left to right) correspond to the marker, control-DNA and *Bam*H1 only, control-DNA only, then concentrations of 1, 4, 7, 11, 15, 18, 21, 25, 29, 32 and 36 M of 1C3mac incubated with DNA and *Bam*H1, followed by the marker.


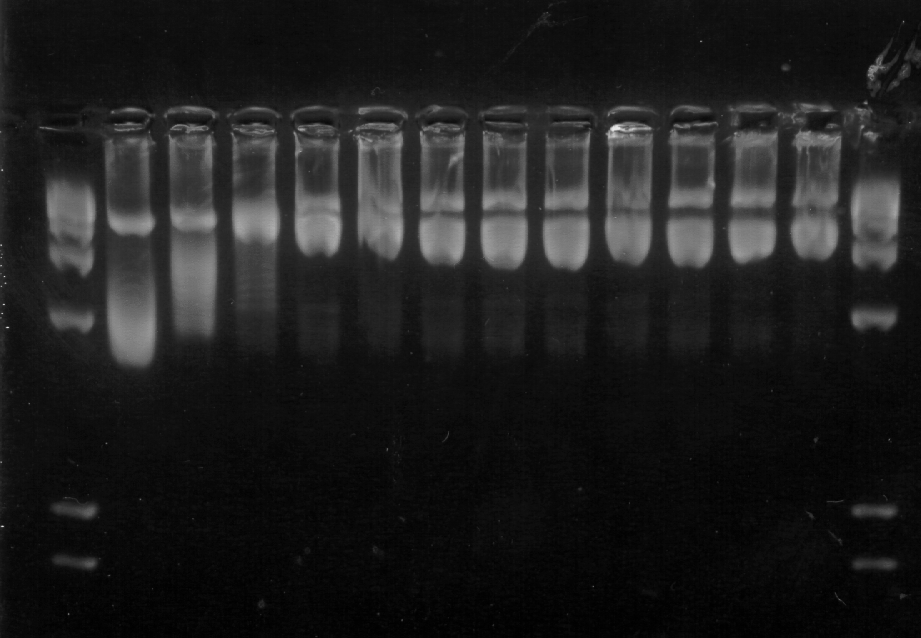


Figure S2: Gel electrophoresis pattern of PBR322 DNA treated with 2C3mac. The lanes (from left to right) correspond to the marker, control-DNA only, then concentrations of 1, 4, 7, 11, 15, 18, 21, 25, 29, 32 and 36 M of 2C3mac incubated with DNA, followed by the marker.


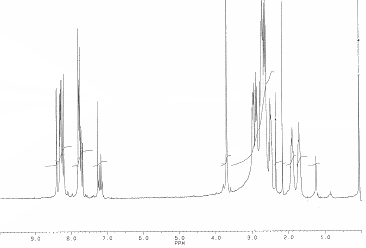


Figure S3: 1H NMR spectra of 2Cmac in CDCl3


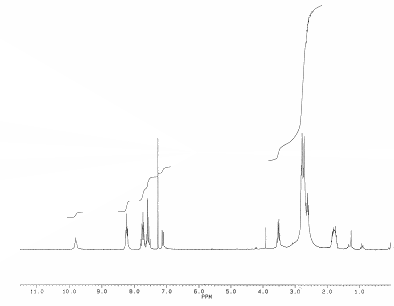


Figure S4: 1H NMR spectra of 1C2mac in CDCl3


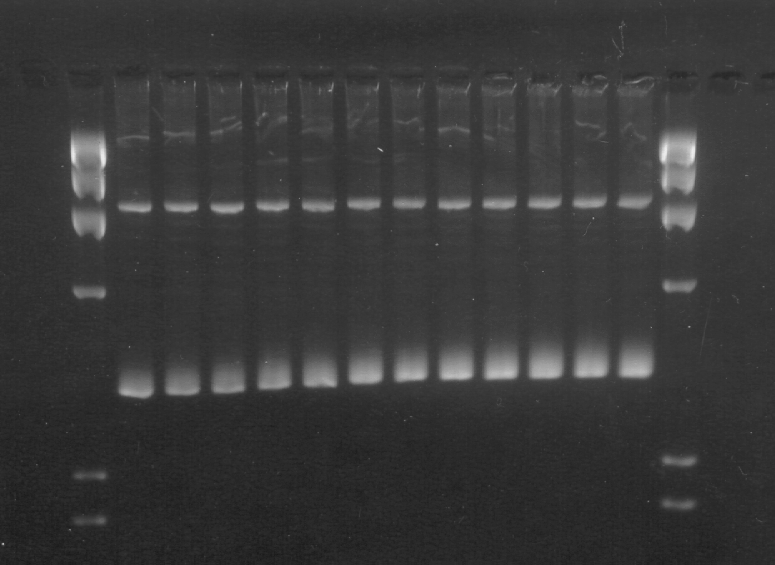


Figure S5: Gel electrophoresis pattern of 2C2 treated PBR322 DNA. The lanes (from left to right) correspond to the marker, control-DNA only, then concentrations of 1, 10, 20, 30, 40, 50, 60, 70, 80, 90 and 100 M of 2C2 incubated with DNA, followed by the marker


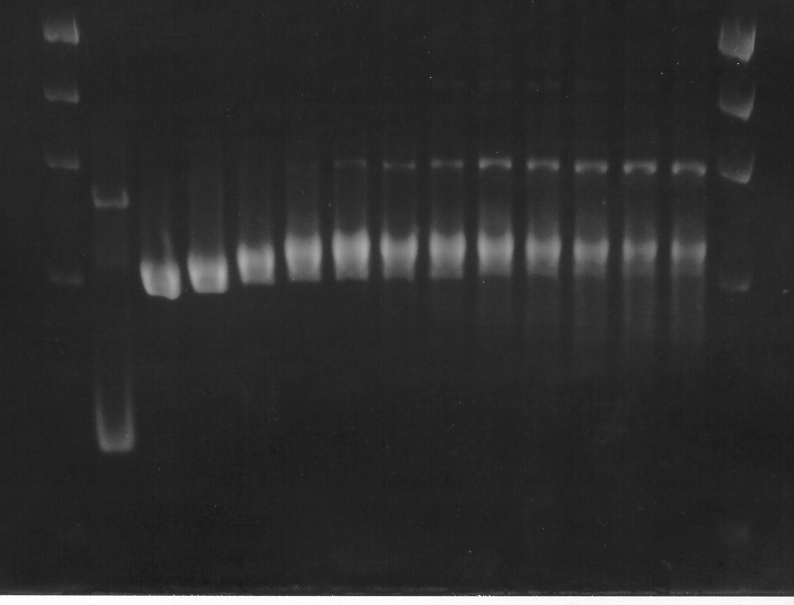


Figure S6: Gel electrophoresis pattern of daunomycin treated PBR322 DNA with *Pvu*II restriction enzyme. The lanes (from left to right) correspond to the marker, control-DNA only, control-DNA and *Pvu*II only, then concentrations of 1, 5, 10, 15, 20, 25, 30, 35, 40, 45 and 50 M of daunomycin incubated with DNA and *Pvu*II, followed by the marker


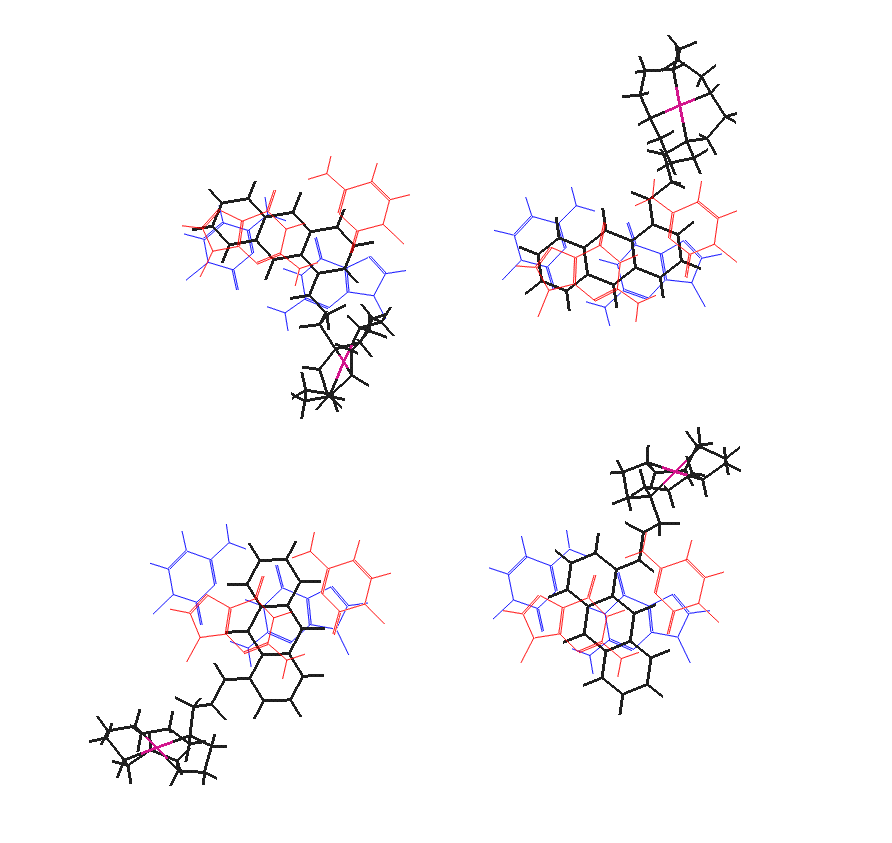


Figure S7: The overlap of 1C2mac (black) with a metal in the macrocycle (violet) and the pair of bases above (red) and below (blue) the intercalator when it is orientated in (a) a parallel position with the side chain in the minor groove, (b) a parallel position with the side chain in the major groove, (c) a perpendicular position with the side chain in the minor groove, and (d) a perpendicular position with the side chain in the major groove.


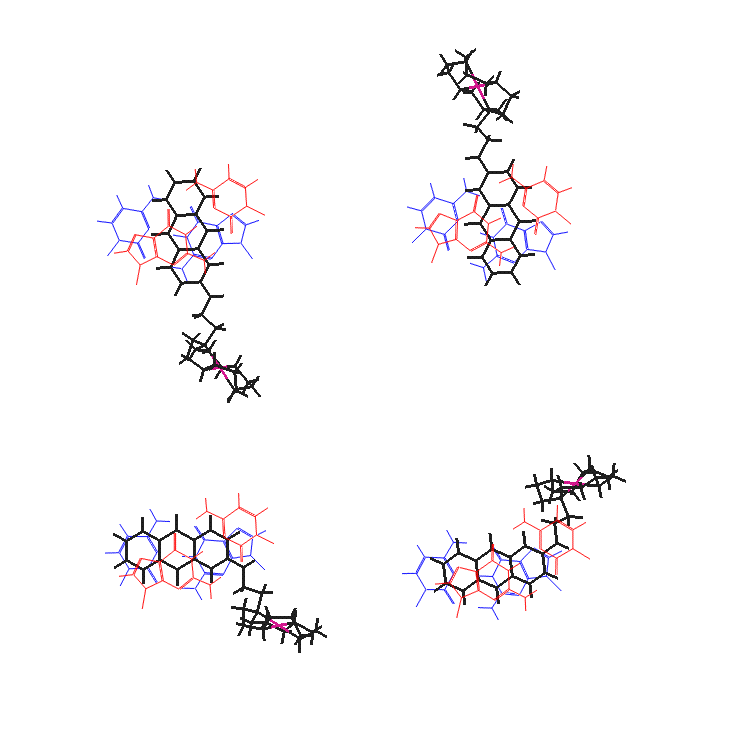


Figure S8: The overlap of metal(violet)-2C2mac (black) and the pair of bases above (red) and below (blue) the intercalator when it is orientated in (a) a parallel position with the side chain in the minor groove, (b) a parallel position with the side chain in the major groove, (c) a perpendicular position with the side chain in the minor groove, and (d) a perpendicular position with the side chain in the major groove.
